# Supplementary material for: Template-free hydrothermal synthesis of Li2FeSiO4hollow spheres as cathode materials for lithium-ion batteries
Source: Royal Society of Chemistry journal article supplement (doi:10.1039/c4ta02384f), 2014-06-17
Supplement: c4ta02384f1.pdf [file c4ta02384f1.pdf]

**Supplementary Information for**  
**“Template-free Hydrothermal Synthesis of  $\text{Li}_2\text{FeSiO}_4$  Hollow**  
**Spheres as Cathode Materials for Lithium-ion Batteries”**

**by**

Yimeng Xu<sup>‡</sup>, Wei Shen<sup>‡</sup>, Aili Zhang<sup>‡</sup>, Haimei Liu<sup>†‡\*</sup>, Zifeng Ma<sup>§</sup>

<sup>†</sup>College of Environmental and Chemical Engineering, Shanghai University of

Electric Power, Shanghai 200090, China

<sup>‡</sup>State Key Laboratory of Chemical Resource Engineering, Beijing University of

Chemical Technology, Beijing 100029, China

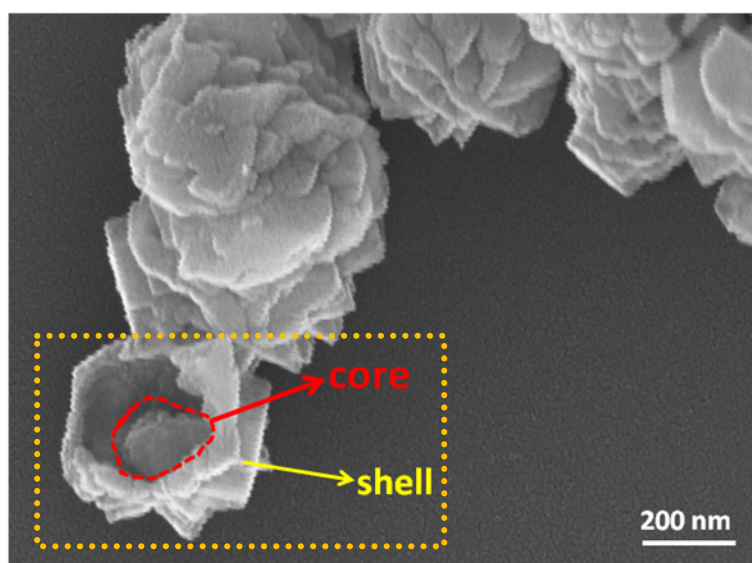

**Fig.S1** SEM image of LFS hydrothermal synthesized for two days which obviously shows a core-shell structure.

---

\* The authors to whom correspondence should be addressed,  
e-mail: liuhm@shiep.edu.cn; liuhm@mail.buct.edu.cn (H. Liu).

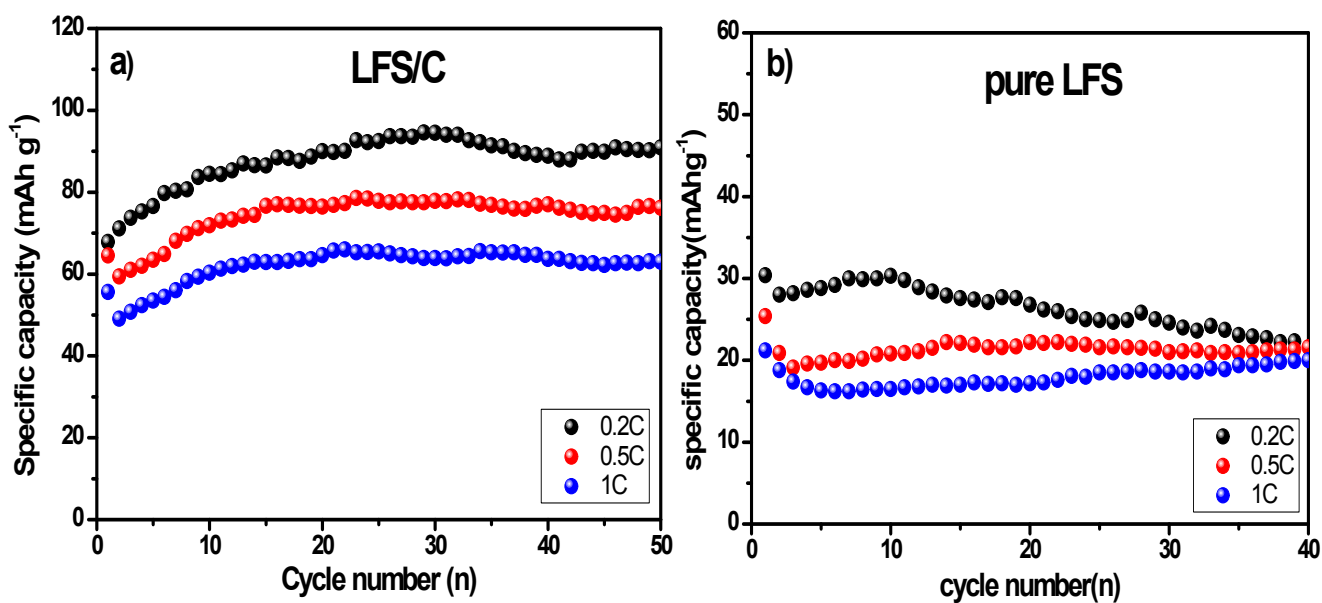

**Fig.S2** Cycling performances of LFS-3d with a) and without b) carbon coating at various current densities.

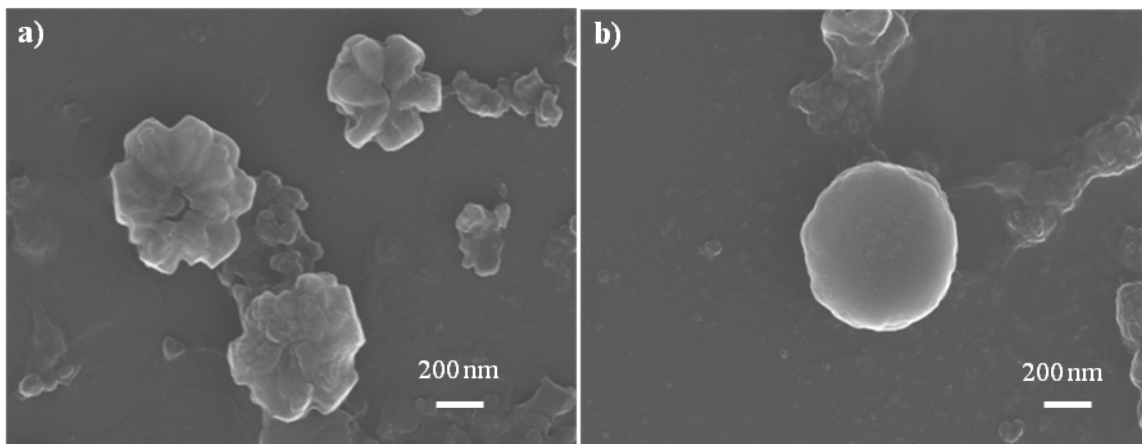

**Fig.S3** SEM images of LFS/C-3d hollow sphere cathode after 50 cycles under 1C rate.
